# Supplementary material for: Association of Oral Status and Early Primary Hypertension Biomarkers among Children and Adolescents
Source: MDPI journal article supplement (doi:10.3390/ijerph17217981), 2020-10-30
Supplement: s1 [file s1]

**Table 1A (Supplementary).** Overview of linear and squared weighted Kappa coefficients as measures of interrater reliability (re-training 1 and 2 was performed during the course of the study).

| No. of training      | Mean of linear weighted Kappa coefficients | Mean of square weighted Kappa coefficients |
|----------------------|--------------------------------------------|--------------------------------------------|
| 1 (Initial training) | 0.82                                       | 0.91                                       |
| 2 (retraining 1)     | 0.84                                       | 0.93                                       |
| 3 (retraining 2)     | 0.83                                       | 0.92                                       |

**Table 3 (Supplementary).** Significant results of linear regression test with clinical and biochemical parameters ( $p < 0.05$ ) between HA and Ctrl groups.

| HA group<br>n=58        | R2      | p-value | Ctrl group<br>n=48 | R2    | p-value  |
|-------------------------|---------|---------|--------------------|-------|----------|
| UA & creatinine         | 0.1     | 0.04    | UA & creatinine    | 0.1   | 0.02     |
| UA & BMI                | 0.3     | 0.00004 | UA & cystatin C    | 0.01  | 0.4      |
| UA & dt                 | 0.00009 | 0.1     | UA & BMI           | 0.3   | 0.000005 |
| UA & dmft               | 0.04    | 0.2     |                    |       |          |
| cystatin C & DT         | 0.007   | 0.7     | cystatin C & BMI   | 0.006 | 0.6      |
| cystatin C & PCR%       | 0.04    | 0.3     |                    |       |          |
| creatinine & cystatin C | 0.05    | 0.2     | creatinine & BMI   |       |          |
| creatinine & BMI        | 0.2     | 0.008   | creatinine & dt    | 0.08  | 0.03     |
| creatinine & DMFT       | 0.03    | 0.2     | creatinine & dmft  | 0.07  | 0.04     |
| creatinine & dt         | 0.2     | 0.007   |                    | 0.1   | 0.01     |
| creatinine & dmft       | 0.2     | 0.0006  |                    |       |          |
| creatinine & PCR%       | 0.003   | 0.7     |                    |       |          |

Abbreviations: n= number of patients; HA=patients diagnosed with primary hypertension; Ctrl= control group, healthy children; BMI= Body Mass Index [kg/m<sup>2</sup>]; DMFT score= decayed missing filled secondary teeth; DT= number of decayed permanent teeth; UA- uric acid; dt= number of decayed primary teeth; dmft score= decayed missing filled primary teeth; PCR%= plaque control record index; BOP%= bleeding on probe index.
